# Supplementary material for: Isolation of MLL1 Inhibitory RNA Aptamers
Source: PubMed Central journal article supplement — Biomol Ther (Seoul). 2018 Nov 12;27(2):201–9. doi: 10.4062/biomolther.2018.157 (PMC6430220; doi:10.4062/biomolther.2018.157), 2018-11-12
Supplement: BT-27-201_sup.pdf [file BT-27-201_sup.pdf]

# Supplemental Data

1

## 2 **Isolation of MLL1 inhibitory RNA aptamers**

3 **Short title: MLL1 binding ssRNA aptamers**

4

5 **Asad Ul-Haq, Ming Li Jin, Kwang Won Jeong, Hwan-Mook Kim, and Kwang-Hoon Chun<sup>†</sup>**

6

7 *Gachon Institute of Pharmaceutical Sciences, College of Pharmacy, Gachon University, Incheon*  
8 *21936, Republic of Korea*

9 **<sup>†</sup>Correspondence to: Kwang-Hoon Chun, College of Pharmacy, Gachon University, Incheon 21936,**  
10 **Republic of Korea**

11 **Tel.: +82-32-820-4951**

12 **E-mail: khchun@gachon.ac.kr**

13

## 14 **Supplementary Materials and Methods**

### 15 **Prediction of secondary and G-quadruplex structure**

16 Secondary structures of five highly popular aptamers were predicted by Mfold algorithm  
17 (<http://mfold.rna.albany.edu>) [1]. Default parameters were used. G-quadruplex structure formation was  
18 predicted by QGRS algorithm (<http://bioinformatics.ramapo.edu/QGRS/analyze.php>) [2]. Putative  
19 G-quadruplex is evaluated from the motif  $G_xN_{y1}G_xN_{y2}G_xN_{y3}G_x$  in this algorithm. “x” represents the  
20 number of guanine tetrads and “y1-y3” represents gaps on the loops.

21

### 22 ***In silico* evaluation of MLL1-aptamer interaction by *cat*RAPID**

23 RNA-binding proteins (RBPs) recognize their target RNAs through the RNA-binding domains (RDs).  
24 The classical RDs are domains well established such as RNA-recognition motif while non-classical RDs  
25 has no annotation yet. *cat*RAPID signature predicts RNA-binding ability and RDs in the proteins using 80  
26 different physico-chemical properties. The interaction probability among protein-nucleotide pairs was  
27 evaluated using *cat*RAPID algorithm ([http://s.tartagliolab.com/page/catrapid\\_group](http://s.tartagliolab.com/page/catrapid_group)) [3]. *cat*RAPID  
28 *signature* calculates overall RNA-binding ability and RNA-binding regions. This algorithm utilizes  
29 physico-chemical features for prediction instead of sequence similarity searches. *cat*RAPID *fragments*  
30 divides protein and oligonucleotides into fragments and predicts the interaction propensities. *cat*RAPID  
31 *strength* calculates the strength of a protein-RNA pair based on a reference set. Reference sequences have  
32 the same lengths of the protein-RNA pair of interest. The primary sequences of aptamers and MLL1 SET  
33 domain sequence (Protein data bank (PDB) - 2W5Y) were used.

34

35

36

## 37 **Supplementary Tables**

### 38 **Table S1**

|             | <b>G-quadruplex structure</b>                                                                                 | <b>G-score</b> |
|-------------|---------------------------------------------------------------------------------------------------------------|----------------|
| <b>APT1</b> | 5'-GGCUCGAGGAACGUACAGA- <u><b>GGGUGG</b></u> AGAGU <u><b>GGGUGG</b></u> -AAGCUUACGGUACCUAG-3'                 | <b>18</b>      |
| <b>APT2</b> | 5'-GGCUCGAGGACGU AACAGA- <u><b>GGGAGGG</b></u> CGAGU <u><b>GGGUGG</b></u> -AAGCUUACGGUACCUAGC-3'              | <b>18</b>      |
| <b>APT3</b> | 5'-GGCUCGAGGACCGAAGUCGA- <u><b>GGGGG</b></u> ACGUGA <u><b>GGGGG</b></u> -AAGCUUACGGUACCUAGC-3'                | <b>16</b>      |
| <b>APT4</b> | 5'-GGCUCGAGGACCUAAGU- <u><b>GGGAAGGG</b></u> UGAGC <u><b>GGGUGGG</b></u> -AAGCUUACGGUACCUAGC-3'               | <b>19</b>      |
| <b>APT5</b> | 5'-GGCUCGAGGAACGUACAGA- <u><b>GGGC</b></u> <u><b>GG</b></u> AGAGU <u><b>GGGUGG</b></u> -AAGCUUACGGUACCUAGC-3' | <b>18</b>      |

39

### 40 **Table S1. QGRS sequences found in five aptamers**

41 G-quadruplex structure formation was predicted by Quadruplex forming G-Rich Sequences (QGRS).

42 Suggested G-quadruplex structures were shown in italic and guanine nucleotides were underlined in bold.

43

44 **Table S2**

|      | # | Protein region | Interaction propensity | Discriminative power | Normalized score |
|------|---|----------------|------------------------|----------------------|------------------|
| APT1 | 1 | 101–152        | 9.97                   | 28                   | 1.77             |
|      | 2 | 67–118         | 8.44                   | 26                   | 1.29             |
|      | 3 | 26–77          | 7.41                   | 24                   | 0.97             |
|      | 4 | 76–127         | 5.68                   | 22                   | 0.43             |
|      | 5 | 42–93          | 4.1                    | 20                   | -0.07            |
|      | 6 | 117–168        | 1.54                   | 17                   | -0.87            |
|      | 7 | 92–143         | 1.04                   | 17                   | -1.02            |
|      | 8 | 51–102         | 0.67                   | 17                   | -1.14            |
| APT2 | 1 | 101–152        | 12.16                  | 35                   | 1.77             |
|      | 2 | 67–118         | 10.42                  | 32                   | 1.31             |
|      | 3 | 26–77          | 9.19                   | 28                   | 0.98             |
|      | 4 | 76–127         | 7.16                   | 24                   | 0.44             |
|      | 5 | 42–93          | 5.25                   | 22                   | -0.07            |
|      | 6 | 117–168        | 2.27                   | 17                   | -0.86            |
|      | 7 | 92–143         | 1.72                   | 17                   | -1.01            |
|      | 8 | 51–102         | 1.32                   | 17                   | -1.11            |
| APT3 | 1 | 101–152        | 13.5                   | 37                   | 1.77             |
|      | 2 | 67–118         | 11.56                  | 33                   | 1.31             |
|      | 3 | 26–77          | 10.15                  | 32                   | 0.97             |
|      | 4 | 76–127         | 7.97                   | 24                   | 0.45             |
|      | 5 | 42–93          | 5.89                   | 22                   | -0.05            |
|      | 6 | 117–168        | 2.6                    | 17                   | -0.84            |
|      | 7 | 92–143         | 1.85                   | 17                   | -1.02            |
|      | 8 | 51–102         | 1.49                   | 17                   | -1.11            |

45

46 **Table S2. Interaction probability between MLL1 and aptamers**

47 Interaction propensity and discriminative power were calculated between protein fragments and aptamers

48 from catRAPID *fragment*.

49

50

## 51 **Supplementary Figure Legends**

52

### 53 **Figure S1. Computational prediction of MLL1-aptamer binding possibilities**

54 (A) RNA-binding ability of MLL1 protein was evaluated using *catRAPID signature* algorithm. The  
55 web server reported the binding probability for the non-classical, classical, and putative RNA-  
56 binding protein classes, with an overall interaction score. Prediction score > 0.5 suggests high  
57 possibility for RNA binding. (B) The profile predicts the amino acid positions prone to bind  
58 RNA. (C) *catRAPID strength* was used to predict the interaction strength of aptamers with  
59 MLL1. The interaction strength is computed using a reference set composed by 100 random  
60 protein and 100 random RNA sequences having the same lengths as the molecules under  
61 investigation.

62

63

## Figure S1

**A**

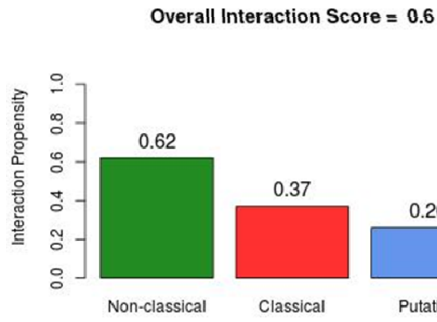

**B**

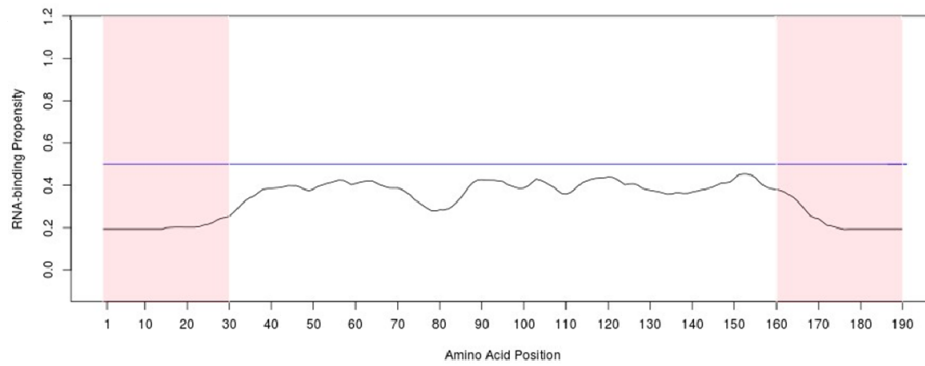

64

**C**

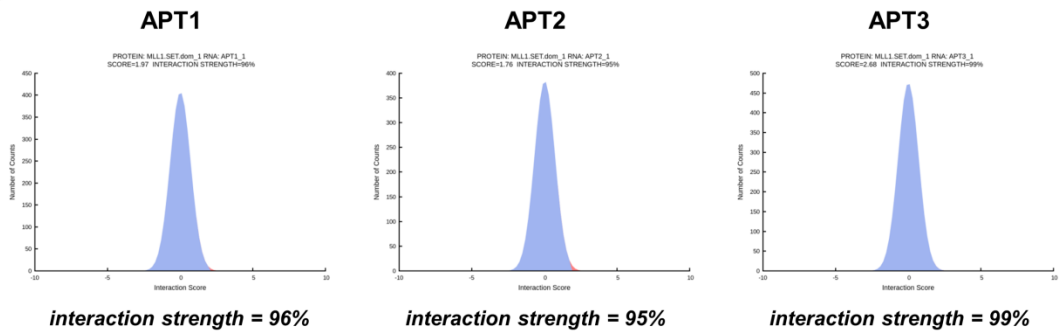

65

66

67

## 68 **References**

- 69 1. Zuker, M., *Mfold web server for nucleic acid folding and hybridization prediction*.  
70 Nucleic Acids Res, 2003. **31**(13): p. 3406-15.
- 71 2. Kikin, O., L. D'Antonio, and P.S. Bagga, *QGRS Mapper: a web-based server for*  
72 *predicting G-quadruplexes in nucleotide sequences*. Nucleic Acids Res, 2006. **34**(Web  
73 Server issue): p. W676-82.
- 74 3. Agostini, F., et al., *catRAPID omics: a web server for large-scale prediction of protein-*  
75 *RNA interactions*. Bioinformatics, 2013. **29**(22): p. 2928-30.

76
